# Supplementary material for: Sources of interannual yield variability in JULES-crop and implications for forcing with seasonal weather forecasts
Source: Copernicus journal article supplement (doi:10.5194/gmd-8-3987-2015), 2015-12-15
Supplement: Supplementary file 1 [file gmd-8-3987-2015-supplement.pdf]

Supplement of Geosci. Model Dev., 8, 3987–3997, 2015  
<http://www.geosci-model-dev.net/8/3987/2015/>  
doi:10.5194/gmd-8-3987-2015-supplement  
© Author(s) 2015. CC Attribution 3.0 License.

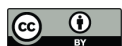

*Supplement of*

## **Sources of interannual yield variability in JULES-crop and implications for forcing with seasonal weather forecasts**

**K. E. Williams and P. D. Falloon**

*Correspondence to:* K. Williams ([karina.williams@metoffice.gov.uk](mailto:karina.williams@metoffice.gov.uk))

The copyright of individual parts of the supplement might differ from the CC-BY 3.0 licence.

| name         | mean | standard deviation | global corr with control | global corr with disagg |
|--------------|------|--------------------|--------------------------|-------------------------|
| maize        |      |                    |                          |                         |
| control      | 10.6 | 0.55               |                          |                         |
| irrig        | 16.2 | 0.18               | 0.48                     |                         |
| init         | 10.3 | 0.48               | 0.91                     |                         |
| disagg       | 10.2 | 0.53               | 0.98                     |                         |
| sens-T       | 10.7 | 0.23               |                          | 0.23                    |
| sens-P       | 10.9 | 0.42               |                          | 0.87                    |
| sens-TP      | 11.1 | 0.51               |                          | 0.92                    |
| sens-TPR     | 11.1 | 0.50               |                          | 0.92                    |
| sens-TPW     | 10.3 | 0.52               |                          | 0.96                    |
| soybean      |      |                    |                          |                         |
| control      | 6.23 | 0.38               |                          |                         |
| irrig        | 8.22 | 0.31               | 0.44                     |                         |
| init         | 6.06 | 0.44               | 0.86                     |                         |
| disagg       | 6.22 | 0.44               | 0.82                     |                         |
| sens-T       | 6.61 | 0.30               |                          | 0.56                    |
| sens-P       | 6.36 | 0.42               |                          | 0.54                    |
| sens-TP      | 6.54 | 0.43               |                          | 0.90                    |
| sens-TPR     | 6.48 | 0.43               |                          | 0.89                    |
| sens-TPW     | 6.32 | 0.42               |                          | 0.97                    |
| rice         |      |                    |                          |                         |
| control      | 7.14 | 0.23               |                          |                         |
| irrig        | 7.91 | 0.23               | 0.80                     |                         |
| init         | 7.14 | 0.21               | 0.98                     |                         |
| disagg       | 6.52 | 0.24               | 0.98                     |                         |
| sens-T       | 6.72 | 0.17               |                          | 0.75                    |
| sens-P       | 6.62 | 0.15               |                          | 0.48                    |
| sens-TP      | 6.64 | 0.20               |                          | 0.98                    |
| sens-TPR     | 6.59 | 0.21               |                          | 0.98                    |
| sens-TPW     | 6.62 | 0.21               |                          | 0.99                    |
| spring wheat |      |                    |                          |                         |
| control      | 4.75 | 0.34               |                          |                         |
| irrig        | 8.29 | 0.10               | 0.19                     |                         |
| init         | 4.01 | 0.27               | 0.86                     |                         |
| disagg       | 4.91 | 0.43               | 0.89                     |                         |
| sens-T       | 4.06 | 0.12               |                          | 0.56                    |
| sens-P       | 5.25 | 0.26               |                          | 0.81                    |
| sens-TP      | 5.30 | 0.36               |                          | 0.95                    |
| sens-TPR     | 5.33 | 0.38               |                          | 0.96                    |
| sens-TPW     | 4.99 | 0.40               |                          | 0.96                    |

**Table A1.** Results from the global runs described in Section 3 of the manuscript. First column is the run name, second is the mean crop yield in  $\text{Mg ha}^{-1}$ , third is the standard deviation of the annual global yield time series in  $\text{Mg ha}^{-1}$ . The fourth column gives the Pearson correlation coefficient with the global yield in the `control` run and the fifth column gives the Pearson correlation coefficient with the global yield in the `disagg` run. All results have been weighted as described in Section 4 of the manuscript.

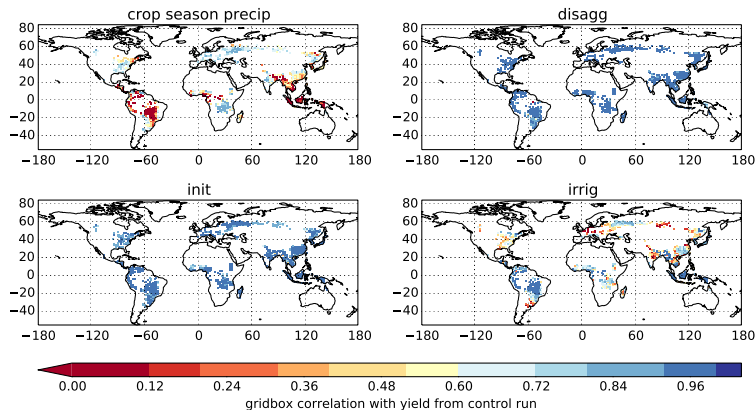

**Figure A1.** All plots show the correlations with the annual soybean yield in the `control` run for each gridbox. Top left: the correlation between yield in `control` run and crop season precipitation. Top right, bottom left and bottom right: the correlation between yield in `control` run and yield in the `disagg`, `init` and `irrig` runs, respectively.

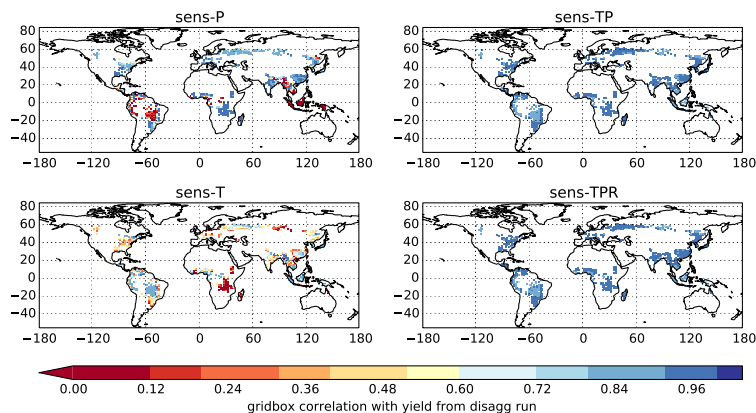

**Figure A2.** The correlations between the annual soybean yield in the `control` run and the annual soybean yield from the `sens-P` (top left), `sens-TP` (top right), `sens-T` (bottom left) and `sens-TPR` (bottom right) runs for each gridbox.



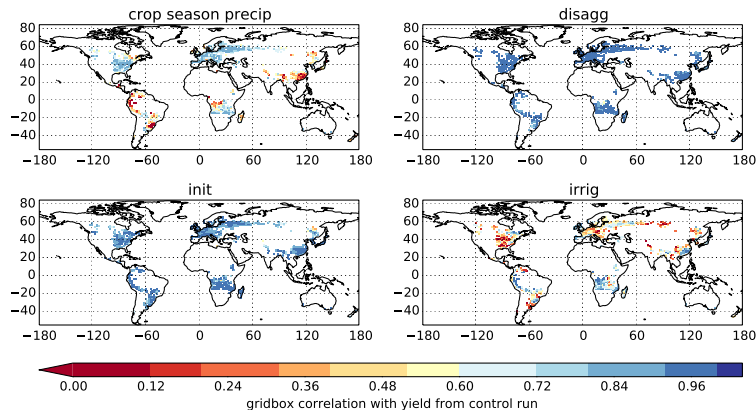

**Figure A3.** All plots show the correlations with the annual spring wheat yield in the `control` run for each gridbox. Top left: the correlation between yield in `control` run and crop season precipitation. Top right, bottom left and bottom right: the correlation between yield in `control` run and yield in the `disagg`, `init` and `irrig` runs, respectively.

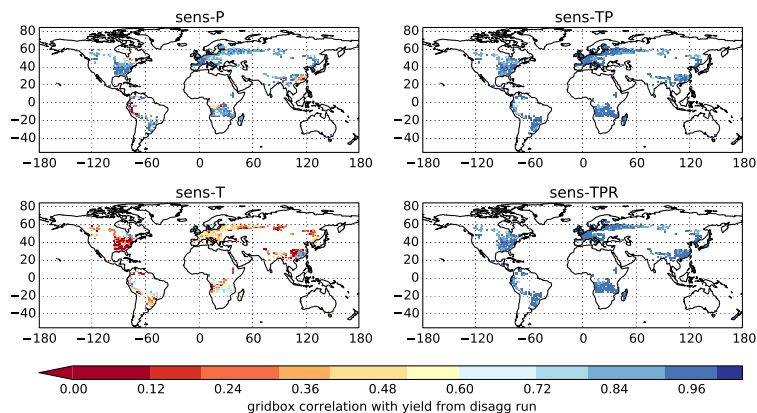

**Figure A4.** The correlations between the annual spring wheat yield in the `control` run and the annual spring wheat yield from the `sens-P` (top left), `sens-TP` (top right), `sens-T` (bottom left) and `sens-TPR` (bottom right) runs for each gridbox.

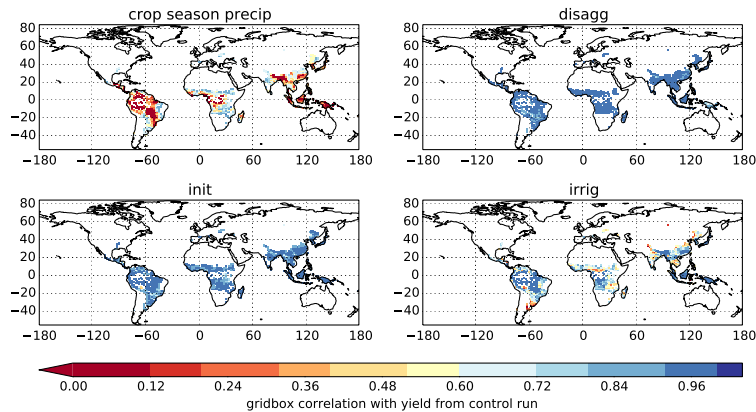

**Figure A5.** All plots show the correlations with the annual rice yield in the `control` run for each gridbox. Top left: the correlation between yield in `control` run and crop season precipitation. Top right, bottom left and bottom right: the correlation between yield in `control` run and yield in the `disagg`, `init` and `irrig` runs, respectively.

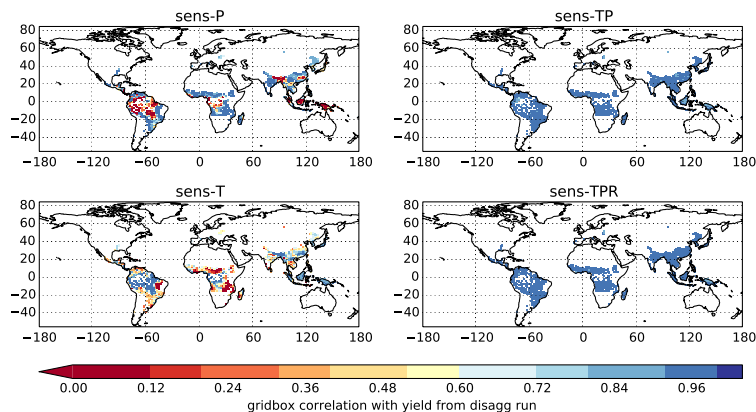

**Figure A6.** The correlations between the annual rice yield in the `control` run and the annual rice yield from the `sens-P` (top left), `sens-TP` (top right), `sens-T` (bottom left) and `sens-TPR` (bottom right) runs for each gridbox.
